# Supplementary figures and images for: Quasi-solid state uniaxial and biaxial deformation of PET/MWCNT composites: structural evolution, electrical and mechanical properties
Source: Royal Society of Chemistry journal article supplement (doi:10.1039/c3ra22597f), 2013-01-01

Figure S1

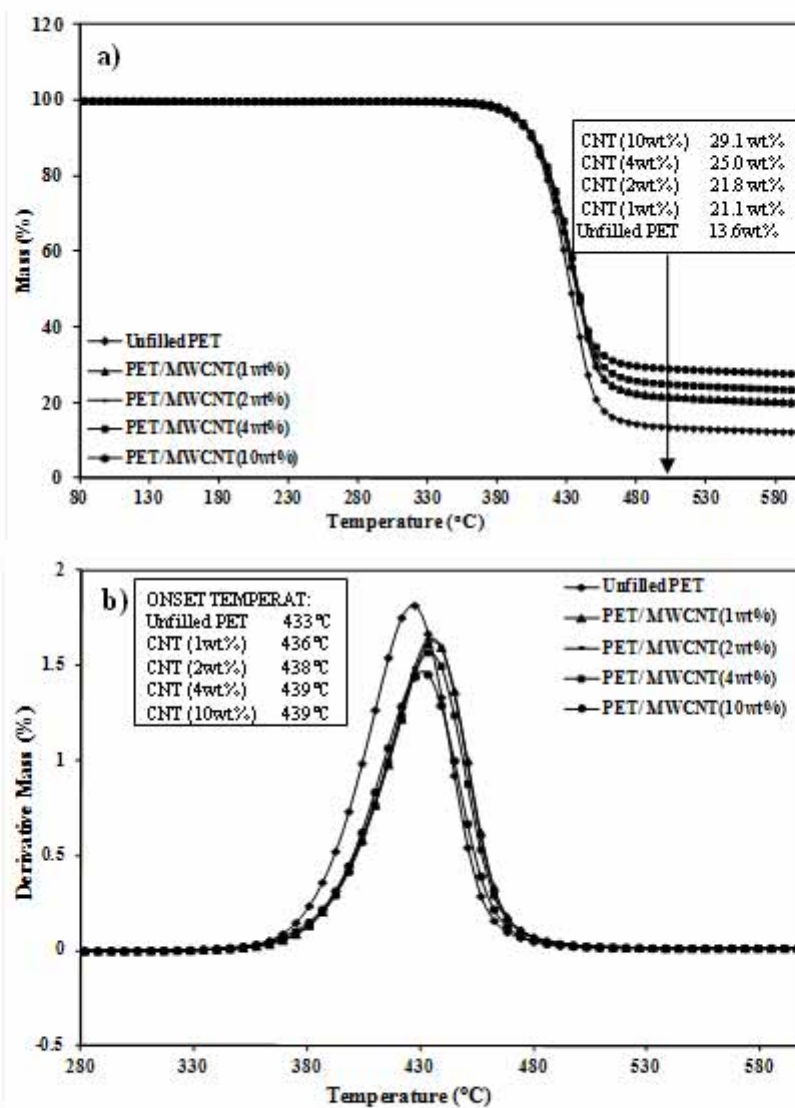

Supplement: c3ra22597f.pdf [file c3ra22597f.pdf]
